# Supplementary material for: Experimental Chemotherapy-Induced Mucositis: A Scoping Review Guiding the Design of Suitable Preclinical Models
Source: MDPI journal article supplement (doi:10.3390/ijms232315434), 2022-12-06
Supplement: s1 [file s1]

**Table S2.** Summary of data collected from *in vivo* animal studies involving other chemotherapeutic agents-induced intestinal mucositis. Drug concentrations obtained from studies were listed in a range of minimum to maximum dosage administered in animal models.

| Drugs              | Animal models | Number of articles | Dosage of drug                          | References                                     |
|--------------------|---------------|--------------------|-----------------------------------------|------------------------------------------------|
| Doxorubicin        | Mice          | 10                 | 10 – 20 mg/kg i.p.                      | 187, 188, 189, 190, 191, 192, 193, 8, 194, 195 |
|                    | Rats          | 2                  | 20 mg/kg i.p.                           | 130, 196                                       |
|                    | Piglets       | 1                  | 100 mg/m <sup>2</sup> surface area i.v. | 197                                            |
| Capecitabine       | Mice          | 1                  | 500 mg/kg orally                        | 198                                            |
| Afatinib           | Zebrafish     | 1                  | 10 – 40 µg/g orally                     | 199                                            |
| SN38               | Zebrafish     | 1                  | 10 – 40 µg/g i.p.                       | 199                                            |
| Ailanthone         | Mice          | 1                  | 2 – 39.8 mg/kg orally                   | 200                                            |
| Melphalan          | Mice          | 1                  | 85.5 – 95.7 mg/m <sup>2</sup> i.p.      | 201                                            |
| Busulfan           | Piglets       | 1                  | 12.8 mg/kg i.v.                         | 202                                            |
|                    | Mice          | 1                  | 40 mg/kg                                | 186                                            |
| Cyclophosphamide   | Mice          | 5                  | 50 – 550 mg/kg i.p.                     | 130, 203, 204, 205, 206                        |
|                    | Rats          | 1                  | 120 mg/kg i.p.                          | 130                                            |
|                    | Piglets       | 1                  | 120 mg/kg i.v.                          | 202                                            |
| Paclitaxel         | Mice          | 1                  | 2 – 4 mg/kg i.v.                        | 207                                            |
| Cytarabine (Ara-C) | Mice          | 1                  | 3.6 mg/mouse i.p.                       | 208                                            |
|                    | Rats          | 1                  | 30 mg/kg s.c.                           | 6                                              |
| Etoposide          | Rats          | 1                  | 40 mg/kg i.p.                           | 130                                            |
| Ifosfamide         | Rabbits       | 1                  | 30 – 60 mg/kg i.v.                      | 209                                            |
| Epirubicin         | Mice          | 1                  | 12 mg/kg i.p.                           | 210                                            |
| Dioscrin           | Rats          | 1                  | 60 mg/kg i.g.                           | 148                                            |
| S-1                | Rats          | 1                  | 20 mg/kg orally                         | 7                                              |
| <b>Total</b>       |               | <b>30</b>          |                                         |                                                |

i.p.: intraperitoneal injection as a route of chemotherapy administration, i.v.: intravenous injection, s.c.: subcutaneous injection, i.g.: intragastrically
